# Supplementary material
Source: Elsevier journal article supplement (https://rcastoragev2.blob.core.windows.net/8583dc3d4e140ea11bd2364041661b12/mmc1.pdf)
Supplement: mmc1 [file mmc1.pdf]

Cell Reports, Volume 32

## Supplemental Information

### **K13-Mediated Reduced Susceptibility to Artemisinin in *Plasmodium falciparum* Is Overlaid on a Trait of Enhanced DNA Damage Repair**

**Aoli Xiong, Prem Prakash, Xiaohong Gao, Marvin Chew, Ian Jun Jie Tay, Charles J. Woodrow, Bevin P. Engelward, Jongyoon Han, and Peter R. Preiser**

## Supplemental material

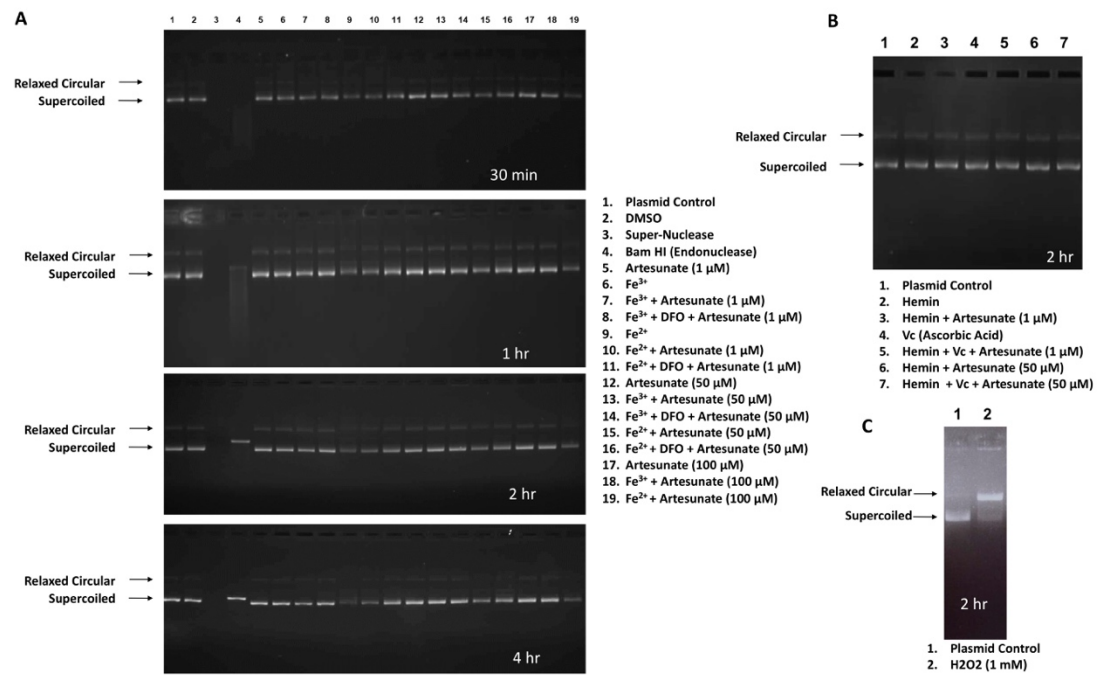

### Supplementary figure 1. Activated artesunate does not induce DNA damage of purified DNA

A. Induced activation of artesunate by ferrous ion (Fe<sup>2+</sup>) and its effect on purified plasmid DNA. B. Activation of artesunate by reduced hemin (haem) using ascorbic acid (Vc) and plasmid treatment. C. H<sub>2</sub>O<sub>2</sub> used as positive control for plasmid DNA damage. Related to STAR Method.

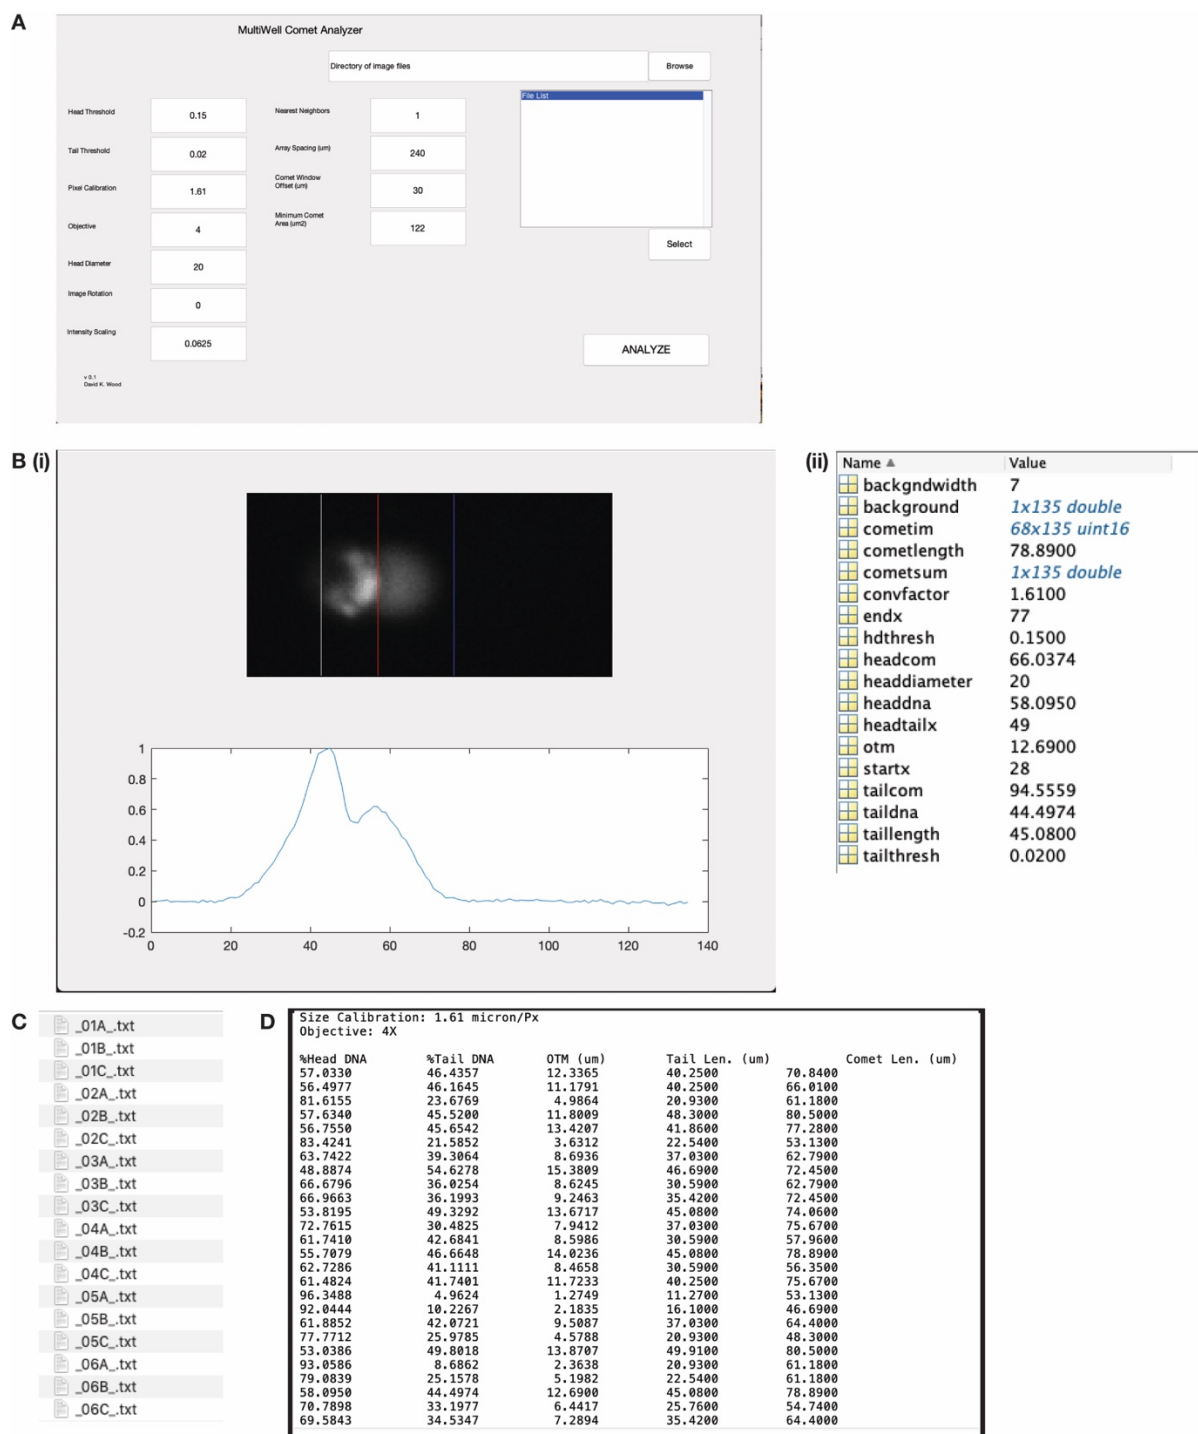

**Supplementary figure 2. Illustration of image analysis using guicomet analyzer algorithm.**

Guicomet analyzer is a customized software developed in MATLAB that used to analyze images generated from CometChip experiment. A. Dialogue window for file selection and parameter setting. When running the software in MATLAB, the dialogue window would pop out, where parameters can be set or adjusted. Image files, labelled using the well position (i.e. 01A), can be then imported by browsing file direction. B. Interim result of individual comet. (i) Comet head (between white line and red line) and tail (between red line and blue line) recognized by the algorithm. (ii) Values reported by the algorithm. During the analysis, the algorithm can automatically identify comet, differentiate head and tail and report values accordingly as shown in the figure. C. Text file list generated by the algorithm for each macro-well. D. Data layout in each text file. For each image file representing one macro-well, a text file containing all the reported value will be generated. Median can then be calculated for each well and exported to excel file for further analysis. Related to STAR Method.

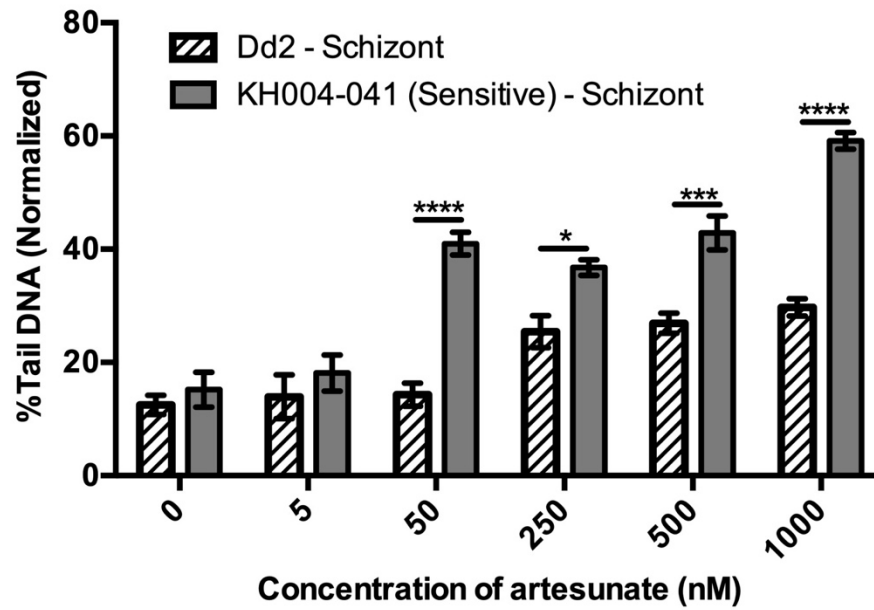

**Supplementary figure 3. Comparison of artesunate-induced DNA damage level in Dd2 and Sensitive Cambodian isolate KH004-041.**

Schizont stage parasites were treated with different concentration of artesunate for 1 hour and subjected to analysis on alkaline CometChip. Data was normalized within each treatment group.  $N \geq 3$ . \* $p < 0.05$ , \*\*\* $p < 0.001$ , \*\*\*\* $p < 0.0001$ , two-way ANOVA. Comparison were made between Dd2 and KH004-041 at each concentration. Same data were plotted separately in Figure 2B and Figure 3A. Related to Figure 2 and Figure 3.

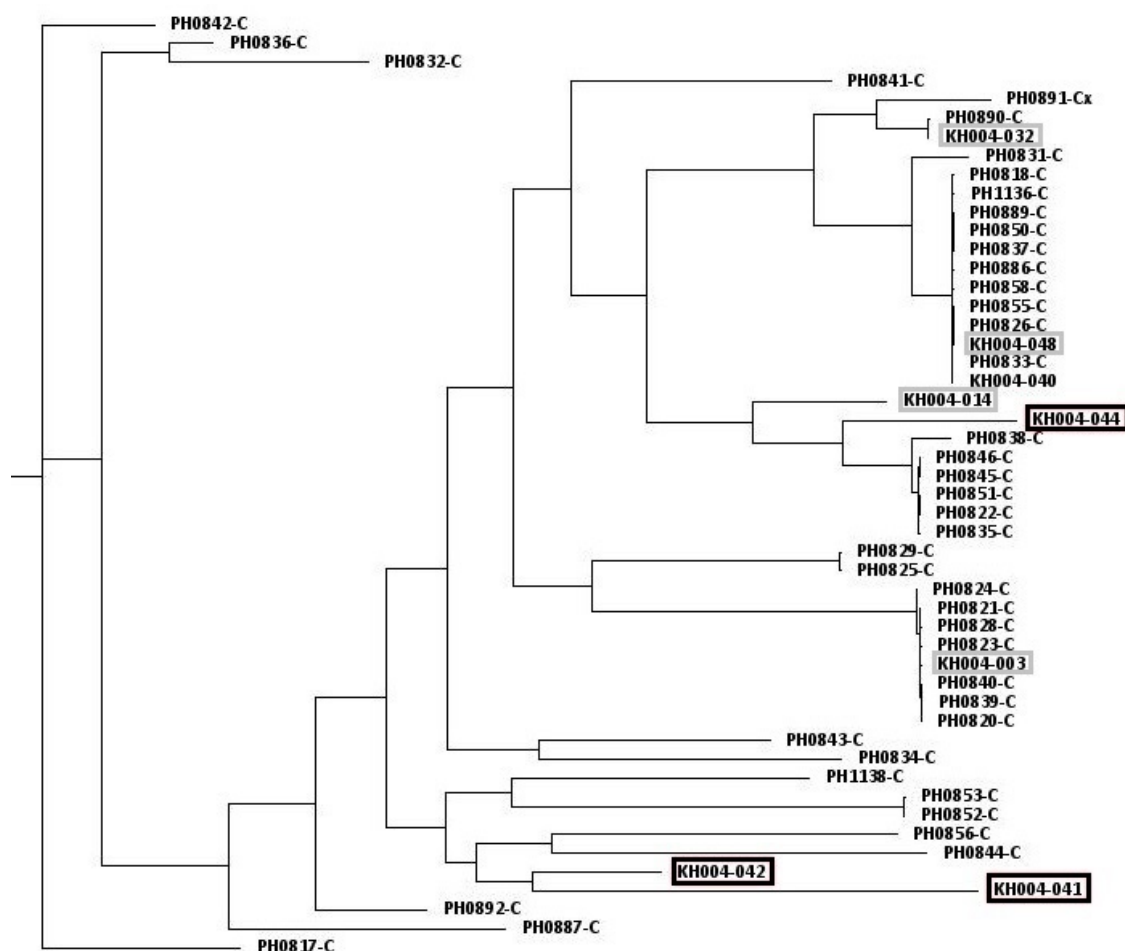

**Supplementary figure 4. Phylogenetic tree based on SNP profile of samples from Pailin, Cambodia 2011.**

VCF file containing SNPs across the whole genome were obtained from open source Pf3K project release 5.1 and analyzed as described in the Method. Black and grey box highlighted strains tested using CometChip. Among them, artemisinin sensitive isolates are labeled in black box, and artemisinin resistant isolates are labeled in grey box. Related to Figure 3 and STAR Method.

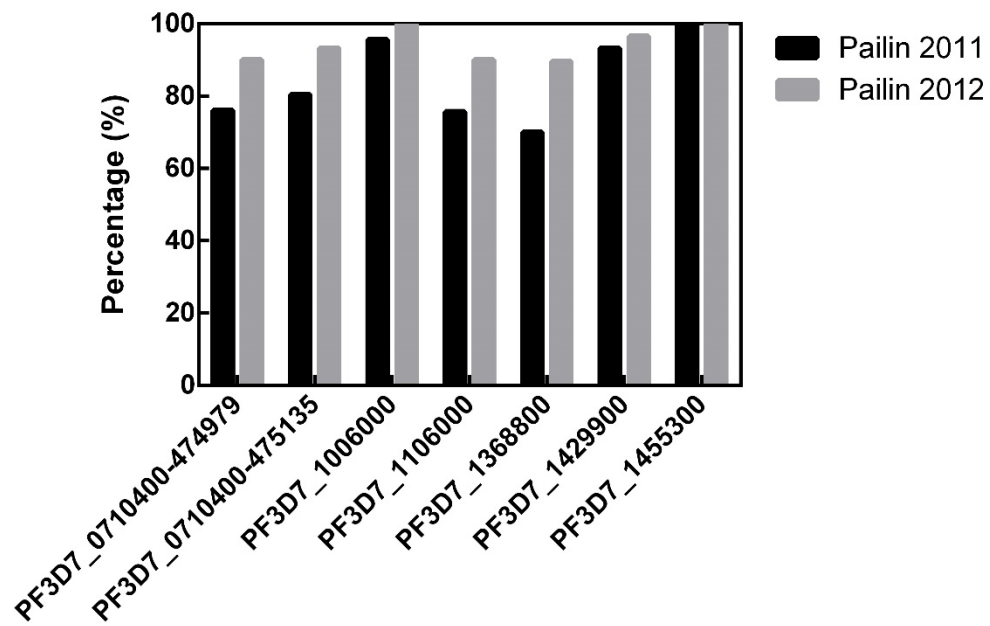

**Supplementary figure 5. Temporal change of the frequency of the ‘EnDNArep genotype’ in K13 parasites from 2011 (black bar) to 2012 (grey bar) in Pailin, Cambodia.**

Related to Figure 5.

**Supplementary table 1. Distribution of mutations in ‘EnDNArepre genotype’ in the KH and Dd2 strains.**

Artemisinin sensitive (red) and resistant (black) strains were compared. Mutant, heterozygote and wild type were labeled in orange, yellow and white, respectively. Related to table 1

| Gene ID       | Position | KH004<br>-041 | KH004<br>-042 | Dd2              | KH004<br>-044 | KH004<br>-003 | KH004<br>-014 | KH004<br>-040 | KH004<br>-048 | KH004<br>-032 |
|---------------|----------|---------------|---------------|------------------|---------------|---------------|---------------|---------------|---------------|---------------|
| PF3D7_0710400 | 474979   |               |               |                  |               |               |               |               |               |               |
|               | 475135   |               |               |                  |               |               |               |               |               |               |
| PF3D7_1006000 | 257175   |               |               |                  |               |               |               |               |               |               |
| PF3D7_1106000 | 257027   |               |               |                  |               |               |               |               |               |               |
| PF3D7_1368800 | 2731444  |               |               |                  |               |               |               |               |               |               |
| PF3D7_1429900 | 1178944  |               |               | TGA<br>TAA<br>TG | *             | *             | T             | T             | T             | *             |
| PF3D7_1455300 | 2260945  |               |               |                  |               |               |               |               |               |               |

Wild type

Heterozygote

Mutant

**Supplementary table 2. List of affected genes.** Related to Table 1.

| Gene ID       | Position        | Product                            | ID of Affected gene(s) | Product description                                     | Predicted function of affected gene(s)                                                                                                                                                                              |
|---------------|-----------------|------------------------------------|------------------------|---------------------------------------------------------|---------------------------------------------------------------------------------------------------------------------------------------------------------------------------------------------------------------------|
| PF3D7_0710400 | 474979 & 475135 | DNA repair protein RAD14, putative | PF3D7_0710200          | conserved Plasmodium protein, unknown function          | GO:0005634 nucleus                                                                                                                                                                                                  |
|               |                 |                                    | PF3D7_0710300          | conserved protein, unknown function                     | GO:0016021 integral component of membrane; GO:0006810 transport; GO:0020011 apicoplast                                                                                                                              |
|               |                 |                                    | PF3D7_0710500          | conserved protein, unknown function                     | GO:0020011 apicoplast                                                                                                                                                                                               |
|               |                 |                                    | PF3D7_0710600          | 60S ribosomal protein L34                               | GO:0005622 intracellular; GO:0005840 ribosome; GO:0003735 structural constituent of ribosome; GO:0006412 translation; GO:0022625 cytosolic large ribosomal subunit; GO:0005634 nucleus                              |
|               |                 |                                    | PF3D7_1005800          | conserved Plasmodium membrane protein, unknown function | GO:0016021 integral component of membrane; GO:0005524 ATP binding; GO:0006810 transport                                                                                                                             |
| PF3D7_1006000 | 257175          | IMP1-like protein, putative        | PF3D7_1005900          | conserved protein, unknown function                     | GO:0005737 cytoplasm; GO:0005524 ATP binding; GO:0016787 hydrolase activity; GO:0016740 transferase activity; GO:0020011 apicoplast                                                                                 |
|               |                 |                                    | PF3D7_1006100          | CCR4-NOT transcription complex subunit 5, putative      | GO:0005634 nucleus; GO:0006355 regulation of transcription, DNA-templated; GO:0030014 CCR4-NOT complex                                                                                                              |
|               |                 |                                    | PF3D7_1006200          | DNA/RNA-binding protein Alba 3                          | GO:0003676 nucleic acid binding; GO:1903561 extracellular vesicle; GO:0020020 food vacuole; GO:0005634 nucleus; GO:0003677 DNA binding; GO:0003723 RNA binding; GO:0003729 mRNA binding; GO:0005515 protein binding |
|               |                 |                                    | PF3D7_1105800          | conserved Apicomplexan protein, unknown function        | GO:0020020 food vacuole; GO:0005739 mitochondrion; GO:0003729 mRNA binding                                                                                                                                          |
| PF3D7_1106000 | 257027          | RuvB-like helicase 2               | PF3D7_1105900          | conserved Plasmodium membrane protein, unknown function | GO:0016021 integral component of membrane; GO:0005886 plasma membrane; GO:0006810 transport                                                                                                                         |

|               |         |                                             |               |                                                               |                                                                                                                                                                                                                                                                                                |
|---------------|---------|---------------------------------------------|---------------|---------------------------------------------------------------|------------------------------------------------------------------------------------------------------------------------------------------------------------------------------------------------------------------------------------------------------------------------------------------------|
|               |         |                                             | PF3D7_1106100 | apicoplast<br>ribosomal protein<br>S15 precursor,<br>putative | GO:0005622<br>intracellular;<br>GO:0005840 ribosome;<br>GO:0003735 structural<br>constituent of ribosome;<br>GO:0006412 translation;<br>GO:0020011 apicoplast                                                                                                                                  |
|               |         |                                             | PF3D7_1106200 | conserved<br>Plasmodium<br>protein, unknown<br>function       | GO:0020011 apicoplast                                                                                                                                                                                                                                                                          |
| PF3D7_1368800 | 2731444 | DNA repair<br>endonuclease<br>XPF, putative | PF3D7_1368700 | mitochondrial<br>carrier protein,<br>putative                 | GO:0022857<br>transmembrane<br>transporter activity;<br>GO:0055085<br>transmembrane<br>transport; GO:0005743<br>mitochondrial inner<br>membrane; GO:0006810<br>transport                                                                                                                       |
| PF3D7_1429900 | 1178944 | ADP-<br>dependent<br>DNA helicase<br>RecQ   | PF3D7_1429800 | coatamer subunit<br>beta, putative                            | GO:0030126 COPI<br>vesicle coat;<br>GO:0030117 membrane<br>coat GO:0005488<br>binding; GO:0005198<br>structural molecule<br>activity; GO:0006886<br>intracellular protein<br>transport; GO:0016192<br>vesicle-mediated<br>transport;<br>GO:0006888ER to<br>Golgi vesicle-mediated<br>transport |
|               |         |                                             | PF3D7_1430000 | conserved protein,<br>unknown function                        | GO:0005737cytoplasm;<br>GO:0016020 membrane                                                                                                                                                                                                                                                    |
| PF3D7_1455300 | 2260945 | conserved<br>Plasmodium<br>protein          | PF3D7_1455200 | methyltransferase,<br>putative,<br>unspecified product        | GO:0008168<br>methyltransferase<br>activity; GO:0009234<br>menaquinone<br>biosynthetic process;<br>GO:0008152 metabolic<br>process; GO:0006744<br>ubiquinone biosynthetic<br>process                                                                                                           |
|               |         |                                             | PF3D7_1455400 | hemolysin III                                                 | GO:0016021 integral<br>component of<br>membrane; GO:0020020<br>food vacuole;<br>GO:0016020 membrane;<br>GO:0044179 hemolysis<br>in other organism                                                                                                                                              |

**Supplementary table 3. List of known DNA repair genes.** Related to Table 1.

| Gene ID       | Gene group | Gene function                                                         |
|---------------|------------|-----------------------------------------------------------------------|
| PF3D7_0107800 | GO         | GO-0006281-BP-DNA repair                                              |
| PF3D7_0107800 | GO         | GO-0006302-BP-double-strand break repair                              |
| PF3D7_0203300 | GO         | GO-0006289-BP-nucleotide-excision repair                              |
| PF3D7_0206000 | GO         | GO-0006281-BP-DNA repair                                              |
| PF3D7_0217400 | GO         | GO-0006281-BP-DNA repair                                              |
| PF3D7_0305600 | GO         | GO-0006281-BP-DNA repair                                              |
| PF3D7_0408500 | GO         | GO-0006281-BP-DNA repair                                              |
| PF3D7_0416400 | GO         | GO-0006281-BP-DNA repair                                              |
| PF3D7_0505500 | GO         | GO-0006281-BP-DNA repair                                              |
| PF3D7_0505500 | GO         | GO-0006298-BP-mismatch repair                                         |
| PF3D7_0509500 | GO         | GO-0006281-BP-DNA repair                                              |
| PF3D7_0513600 | GO         | GO-0006281-BP-DNA repair                                              |
| PF3D7_0514100 | GO         | GO-0006281-BP-DNA repair                                              |
| PF3D7_0605800 | GO         | GO-0006302-BP-double-strand break repair                              |
| PF3D7_0614800 | GO         | GO-0006284-BP-base-excision repair                                    |
| PF3D7_0614800 | GO         | GO-0006281-BP-DNA repair                                              |
| PF3D7_0619100 | GO         | GO-0006281-BP-DNA repair                                              |
| PF3D7_0619100 | GO         | GO-0009380-CC-excinuclease repair complex                             |
| PF3D7_0628600 | GO         | GO-0006281-BP-DNA repair                                              |
| PF3D7_0706700 | GO         | GO-0006298-BP-mismatch repair                                         |
| PF3D7_0710100 | GO         | GO-0006281-BP-DNA repair                                              |
| PF3D7_0710400 | GO         | GO-0006289-BP-nucleotide-excision repair                              |
| PF3D7_0725000 | GO         | GO-0006298-BP-mismatch repair                                         |
| PF3D7_0726300 | GO         | GO-0006298-BP-mismatch repair                                         |
| PF3D7_0803400 | GO         | GO-0000724-BP-double-strand break repair via homologous recombination |
| PF3D7_0910500 | GO         | GO-0006281-BP-DNA repair                                              |
| PF3D7_0917100 | GO         | GO-0006284-BP-base-excision repair                                    |
| PF3D7_0917100 | GO         | GO-0006289-BP-nucleotide-excision repair                              |
| PF3D7_0934100 | GO         | GO-0006289-BP-nucleotide-excision repair                              |
| PF3D7_1003700 | GO         | GO-0006281-BP-DNA repair                                              |
| PF3D7_1006000 | GO         | GO-0006284-BP-base-excision repair                                    |
| PF3D7_1008200 | GO         | GO-0006281-BP-DNA repair                                              |
| PF3D7_1011700 | GO         | GO-0006289-BP-nucleotide-excision repair                              |
| PF3D7_1012000 | GO         | GO-0006281-BP-DNA repair                                              |
| PF3D7_1037600 | GO         | GO-0006281-BP-DNA repair                                              |
| PF3D7_1037600 | GO         | GO-0006289-BP-nucleotide-excision repair                              |
| PF3D7_1106000 | GO         | GO-0006281-BP-DNA repair                                              |
| PF3D7_1107400 | GO         | GO-0006281-BP-DNA repair                                              |
| PF3D7_1112600 | GO         | GO-0006281-BP-DNA repair                                              |
| PF3D7_1117800 | GO         | GO-0006298-BP-mismatch repair                                         |
| PF3D7_1129500 | GO         | GO-0006284-BP-base-excision repair                                    |
| PF3D7_1140300 | GO         | GO-0006281-BP-DNA repair                                              |
| PF3D7_1215700 | GO         | GO-0006298-BP-mismatch repair                                         |
| PF3D7_1244200 | GO         | GO-0006281-BP-DNA repair                                              |
| PF3D7_1250800 | GO         | GO-0006289-BP-nucleotide-excision repair                              |
| PF3D7_1303800 | GO         | GO-0006281-BP-DNA repair                                              |
| PF3D7_1304100 | GO         | GO-0006281-BP-DNA repair                                              |
| PF3D7_1314900 | GO         | GO-0006281-BP-DNA repair                                              |
| PF3D7_1316900 | GO         | GO-0006281-BP-DNA repair                                              |
| PF3D7_1332100 | GO         | GO-0006281-BP-DNA repair                                              |
| PF3D7_1332600 | GO         | GO-0006281-BP-DNA repair                                              |
| PF3D7_1338400 | GO         | GO-0006281-BP-DNA repair                                              |
| PF3D7_1353500 | GO         | GO-0006281-BP-DNA repair                                              |
| PF3D7_1368300 | GO         | GO-0006281-BP-DNA repair                                              |
| PF3D7_1368800 | GO         | GO-0006281-BP-DNA repair                                              |
| PF3D7_1405400 | GO         | GO-0006298-BP-mismatch repair                                         |

|               |    |                                                                       |
|---------------|----|-----------------------------------------------------------------------|
| PF3D7_1415000 | GO | GO-0006284-BP-base-excision repair                                    |
| PF3D7_1427500 | GO | GO-0006298-BP-mismatch repair                                         |
| PF3D7_1429900 | GO | GO-0006281-BP-DNA repair                                              |
| PF3D7_1430600 | GO | GO-0006281-BP-DNA repair                                              |
| PF3D7_1432600 | GO | GO-0006289-BP-nucleotide-excision repair                              |
| PF3D7_1441900 | GO | GO-0006289-BP-nucleotide-excision repair                              |
| PF3D7_1455300 | GO | GO-0006298-BP-mismatch repair                                         |
| PF3D7_1467100 | GO | GO-0006284-BP-base-excision repair                                    |
| PF3D7_1471600 | GO | GO-0000724-BP-double-strand break repair via homologous recombination |
